# Supplementary material
Source: PubMed Central journal article supplement (PMC9650564)
Supplement: mmc3.pdf [file mmc3.pdf]

## **BLUE COMMUNITIES SURVEY - INDONESIA CASE STUDY (ENGLISH VERSION)**

### **Section 1: About you**

In this section, we will ask you various background questions to help us understand what different sections of the local population think about marine issues. Please remember that all the information you provide is **confidential**.

**Interviewer please note: Gender (Male/Female)**

**Interviewer please note: Name of village** \_\_\_\_\_

**Interviewer please note weather:** \_\_\_\_\_  
(clear sky; clear-cloudy; cloudy; light rain / drizzle; rain; heavy rain)

**Q1) Can I ask how old you are please** \_\_\_\_\_ **years.**

**Q2a) Approximately, how far would you say you live from the nearest coast in km?**

- I live on the water;
- Within 1km
- 1 – 2 km
- 2 – 5 km
- 5 – 10 km etc.
- Prefer not say

**Q2b) And roughly how long does it take you to walk to the sea?** \_\_\_\_\_ **minutes**

**Q3) Do you or any member of your household do any of the following types of work (Please select all that apply) /**

- Fishing for market (wild fish/shellfish)
- Fishing/gleaning for family food
- Aquaculture (farmed fish/shellfish/seaweeds)
- Shipping (including freight, passenger, etc.)
- Coastal tourism/recreation (e.g. tourist boats, seaside walking guides, swimming/snorkelling guides)
- Coastal management (e.g. coastline protection, waste water treatment)
- Marine environment protection (e.g. environmental group or government agency, mangrove protection)
- Marine policy/research
- None of the above (*No one in my household works in the marine sector*)
- Don't know/ Prefer not to answer
- Others (Specify \_\_\_\_\_)

**Q4) Do you have personal access to any of the following fishing equipment (check all that apply)**

- Fishing boat
- Fishing gear (Nets, traps, etc)
- Advanced fishing accessories (GPS, Fish Finder, etc)
- Other boat (e.g. for tourism)
- None of the above

**Q5) Do you get income from any of the following activities?**

- Fishing
- Crabbing/shrimping

- Aquaculture (caged fish/fin-fish)
- Seaweed farming
- Post harvest activities (e.g. drying fish, etc)
- Taking tourists on boats etc.
- Other (explain: \_\_\_\_\_)

**Q6) And approximately how much money do you (personally) make from all these activities together per month?**

- ..... (Rupiah)

***We'd like you now to think a little more about where you live and who with***

**Q7a) How many adults [N] (people aged 18 years and over) live in your home?**

- N = ..... (people)
- Prefer not to say

**Q7b) How many children [N] live in your home?**

- N = ..... (people)
- Prefer not to say

**Q7c) Do you live with extended family (parents/brothers/sisters)?**

- Yes
- No
- Prefer not to say

**Q8a) What is your home made of?**

- Concrete/stone/brick
- Wood, bamboo, nipa or mixed plant materials
- Recycled/waste materials (plastic sheeting etc.)

**Q8b) Which of the following best describes your house:**

- I own the house and the lot
- I own the house but borrow (without payment) the lot
- I own the house but rent the lot
- I rent the house and the lot
- I live in an informal dwelling
- Other .....

**Q8c) Which of the following best describes your home's toilet facilities:**

- There are facilities within my home/ on my lot
- I use shared/communal facilities
- I have no access to formal toilet facilities

**Q8d) If you have access to toilet facilities are these:**

- Water-sealed septic tank
- Not water sealed but with septic tank
- Closed pit
- Open pit/open defecation

**Q9) What is the current electrical source in your house?**

- Provided by state electrical company (PLN)
- Communal generator using liquid diesel
- Individual generator using liquid diesel
- Solar panel (communal)
- Solar panel (individual)

***And finally a few questions about your background and affiliations:***

**Q10) What is your highest education level?**

- Elementary level
- Junior High School
- High School level
- College Level
- Elementary graduate
- Junior High School
- High School Graduate
- College Graduate

**Q11) What is your cultural affiliation?**

- Bugis
- Jawa
- Bajo
- Tiongkok
- Flores
- Selayar

**Q12) What is your religious affiliation?**

- Moslem
- Christian Protestant
- Catholic
- Buddhist
- Hindu
- Other believe (Confucian)

**Q13) Do you smoke?**

- Yes
- No
- Yes, but have tried to quit in the past
- Have quit in the past – how long ago.....

**If you answer yes, how many packs do you smoke in a day?**

- Less than 1
- 1 to 3 packs
- 4 to 6 packs
- 7 packs or more

Interviewer to note number of cigarettes in a pack = .....

**If you answer yes, what type of cigarettes do you smoke?**

- Electronic cigarettes
- Filter cigarettes
- Non-filter cigarettes (kréték)
- Hand-rolled herbal/clove cigarettes
- Other .....

**If you answer No, do you think that you are exposed to cigarette smoke for at least 15 minutes a day?**

- No
- Yes

**Q14) How do you dispose your wastes?**

- Disposed to temporary collection station and collected by municipal waste officer.  
*If you answer yes to this option, how many times in a week your wastes are collected? .....*
- Buried
- Open burning
- Open dumping
- Disposed into the sea/river
- Others .....

**Q15) Do you separate your wastes?**

- No
- Yes

**Q16) Do you have a health insurance?**

- Yes, I have National Health Insurance
- Yes, I have a private health insurance
- No

## Section 2: Your interactions with the local marine environment

In this section we would like you to say a little bit more on the kinds of activities you have done in and around the coast in the last week:

| Q16) In the last 7 days how often have you done the following activities? | Number of days |   |   |   |   |   |   | Don't know/<br>prefer not to<br>answer |    |
|---------------------------------------------------------------------------|----------------|---|---|---|---|---|---|----------------------------------------|----|
|                                                                           | No day         |   |   |   |   |   |   |                                        |    |
|                                                                           | 0              | 1 | 2 | 3 | 4 | 5 | 6 |                                        | 7  |
| <b>Livelihoods</b>                                                        |                |   |   |   |   |   |   |                                        |    |
| a) Went wild fish fishing for food or to earn money                       | 0              | 1 | 2 | 3 | 4 | 5 | 6 | 7                                      | 99 |
| b) Went shellfish fishing for crab/shrimp etc.                            | 0              | 1 | 2 | 3 | 4 | 5 | 6 | 7                                      | 99 |
| c) Went gleaning (e.g. shells) at low tide                                | 0              | 1 | 2 | 3 | 4 | 5 | 6 | 7                                      | 99 |
| d) Performed aquaculture activities                                       | 0              | 1 | 2 | 3 | 4 | 5 | 6 | 7                                      | 99 |
| e) Performed seaweed farming activities                                   | 0              | 1 | 2 | 3 | 4 | 5 | 6 | 7                                      | 99 |
| f) Performed post-harvest activities (e.g. fish drying)                   | 0              | 1 | 2 | 3 | 4 | 5 | 6 | 7                                      | 99 |
| g) Nypa palm collection                                                   | 0              | 1 | 2 | 3 | 4 | 5 | 6 | 7                                      | 99 |
| h) Wild food collection (e.g. honey)                                      | 0              | 1 | 2 | 3 | 4 | 5 | 6 | 7                                      | 99 |
| i) Sold produce                                                           | 0              | 1 | 2 | 3 | 4 | 5 | 6 | 7                                      | 99 |
| j) Taken tourists on a boat during tourist season                         | 0              | 1 | 2 | 3 | 4 | 5 | 6 | 7                                      | 99 |
| <b>Day-to-day living</b>                                                  |                |   |   |   |   |   |   |                                        |    |
| k) Washed self/children in the sea                                        | 0              | 1 | 2 | 3 | 4 | 5 | 6 | 7                                      | 99 |
| l) Washed clothes/dishes in the sea                                       | 0              | 1 | 2 | 3 | 4 | 5 | 6 | 7                                      | 99 |
| m) Eaten fresh fish from the bay                                          | 0              | 1 | 2 | 3 | 4 | 5 | 6 | 7                                      | 99 |
| n) Eaten fresh shellfish from the bay                                     | 0              | 1 | 2 | 3 | 4 | 5 | 6 | 7                                      | 99 |
| o) Cut mangroves/made charcoal                                            | 0              | 1 | 2 | 3 | 4 | 5 | 6 | 7                                      | 99 |
| p) Been on a boat for transport (to get to an island)                     | 0              | 1 | 2 | 3 | 4 | 5 | 6 | 7                                      | 99 |
| q) Went swimming/snorkelling for fun                                      | 0              | 1 | 2 | 3 | 4 | 5 | 6 | 7                                      | 99 |
| r) Saw marine mammals/birds/reptiles                                      | 0              | 1 | 2 | 3 | 4 | 5 | 6 | 7                                      | 99 |
| s) Went along the shoreline for play/recreation                           | 0              | 1 | 2 | 3 | 4 | 5 | 6 | 7                                      | 99 |
| <b>Environmental management</b>                                           |                |   |   |   |   |   |   |                                        |    |
| t) Did a beach clean/litter pick                                          | 0              | 1 | 2 | 3 | 4 | 5 | 6 | 7                                      | 99 |
| u) Marine conservation (e.g. planted new mangroves)                       | 0              | 1 | 2 | 3 | 4 | 5 | 6 | 7                                      | 99 |
| v) Conducted marine related patrols                                       | 0              | 1 | 2 | 3 | 4 | 5 | 6 | 7                                      | 99 |
| w) Took part in stakeholder discussions/initiatives                       | 0              | 1 | 2 | 3 | 4 | 5 | 6 | 7                                      | 99 |

### Section 3: The marine environment and your health & wellbeing

In this section we'd like you to think about your health and wellbeing from spending time in/on/around the coast (both good and bad) over the last month (4 weeks), and whether you spoke to a health worker about it.

| <i>Q17) In the last <u>month (4 weeks)</u> have <u>you</u> experienced any of the following health outcomes as a result of spending time in/on/around the water</i> | <i>No</i> | <i>Yes – but did NOT talk to health worker</i> | <i>Yes + talked to health worker</i> | <i>Don't know/ prefer not to answer</i> |
|---------------------------------------------------------------------------------------------------------------------------------------------------------------------|-----------|------------------------------------------------|--------------------------------------|-----------------------------------------|
| <b>Directly marine related</b>                                                                                                                                      |           |                                                |                                      |                                         |
| <i>a) Got cut/stung/bitten by something in/by the water</i>                                                                                                         | 0         | 1                                              | 2                                    | 99                                      |
| <i>b) Picked up a parasite from the sand/water</i>                                                                                                                  | 0         | 1                                              | 2                                    | 99                                      |
| <i>c) Got into difficulties in water/came close to drowning</i>                                                                                                     | 0         | 1                                              | 2                                    | 99                                      |
| <i>d) Had diving related problems (e.g. decompression sickness/ the bends)</i>                                                                                      | 0         | 1                                              | 2                                    | 99                                      |
| <i>e) Got sunburn/sunstroke at sea/on beach</i>                                                                                                                     | 0         | 1                                              | 2                                    | 99                                      |
| <b>General health</b>                                                                                                                                               |           |                                                |                                      |                                         |
| <i>f) Did not have enough to eat (e.g. due to poor fish catch)</i>                                                                                                  | 0         | 1                                              | 2                                    | 99                                      |
| <i>g) Did not have enough to drink and sanitation due to lack of clean water</i>                                                                                    | 0         | 1                                              | 2                                    | 99                                      |
| <i>h) Vomiting, diarrhoea, or stomach ache</i>                                                                                                                      | 0         | 1                                              | 2                                    | 99                                      |
| <i>i) Had fever/headache</i>                                                                                                                                        | 0         | 1                                              | 2                                    | 99                                      |
| <i>j) Had dengue fever</i>                                                                                                                                          | 0         | 1                                              | 2                                    | 99                                      |
| <i>k) Had cramps in legs or other areas</i>                                                                                                                         | 0         | 1                                              | 2                                    | 99                                      |
| <i>l) Other muscular/body pains</i>                                                                                                                                 | 0         | 1                                              | 2                                    | 99                                      |
| <i>m) Had loss of appetite</i>                                                                                                                                      | 0         | 1                                              | 2                                    | 99                                      |
| <i>n) Felt tired, limpness, lameness</i>                                                                                                                            | 0         | 1                                              | 2                                    | 99                                      |
| <i>o) Had earache or discharge from ears</i>                                                                                                                        | 0         | 1                                              | 2                                    | 99                                      |
| <i>p) Had red, painful eyes or discharge from eyes, or blurry vision</i>                                                                                            | 0         | 1                                              | 2                                    | 99                                      |
| <i>q) Had a new skin problem (e.g. itchy/allergic reaction)</i>                                                                                                     | 0         | 1                                              | 2                                    | 99                                      |
| <i>r) Had a urinary tract infection</i>                                                                                                                             | 0         | 1                                              | 2                                    | 99                                      |
| <i>s) Had breathing difficulties/infection/coughing/other respiratory problems (e.g. asthma)</i>                                                                    | 0         | 1                                              | 2                                    | 99                                      |
| <i>t) Had hearing loss</i>                                                                                                                                          | 0         | 1                                              | 2                                    | 99                                      |
| <i>u) Had stroke or nervous problems</i>                                                                                                                            | 0         | 1                                              | 2                                    | 99                                      |
| <i>v) Had paralyzed</i>                                                                                                                                             | 0         | 1                                              | 2                                    | 99                                      |
| <i>w) Had feeling worries, depression or stress</i>                                                                                                                 | 0         | 1                                              | 2                                    | 99                                      |
| <i>x) Had difficulties in sleeping</i>                                                                                                                              | 0         | 1                                              | 2                                    | 99                                      |
| <i>y) Other health conditions you would like to discuss?</i>                                                                                                        | .....     |                                                |                                      |                                         |

## Section 4: SF-12®

### Section 5: How important are these factors for health and wellbeing?

In this part we would like you think about how important do you feel the following factors are for the health and wellbeing of local populations?

| <i>Q18) How <b>important</b> do you think each of the following <b>factors</b> are for local <b>health and wellbeing</b>.</i> | <i>Not<br/>important at<br/>all</i> | <i>Maybe<br/>important</i> | <i>Important</i> | <i>Very<br/>important</i> | <i>Don't<br/>know/<br/>rather not<br/>answer</i> |
|-------------------------------------------------------------------------------------------------------------------------------|-------------------------------------|----------------------------|------------------|---------------------------|--------------------------------------------------|
|                                                                                                                               | (1)                                 | (2)                        | (3)              | (4)                       |                                                  |
| <b>Health services</b>                                                                                                        |                                     |                            |                  |                           |                                                  |
| <i>a) Improve people's awareness of how to look after their own health</i>                                                    | 1                                   | 2                          | 3                | 4                         | 99                                               |
| <i>b) Better integrate traditional and modern medicines</i>                                                                   | 1                                   | 2                          | 3                | 4                         | 99                                               |
| <i>c) Improve children's swimming ability</i>                                                                                 | 1                                   | 2                          | 3                | 4                         | 99                                               |
| <i>d) Train more local health assistants</i>                                                                                  | 1                                   | 2                          | 3                | 4                         | 99                                               |
| <i>e) Provide health centres with more equipment/medicines</i>                                                                | 1                                   | 2                          | 3                | 4                         | 99                                               |
| <i>f) Increase the number of doctors/nurses/midwives</i>                                                                      | 1                                   | 2                          | 3                | 4                         | 99                                               |
| <b>Infrastructure and facilities</b>                                                                                          |                                     |                            |                  |                           |                                                  |
| <i>g) Improve local housing quality</i>                                                                                       | 1                                   | 2                          | 3                | 4                         | 99                                               |
| <i>h) Provide areas for informal settlers to live in</i>                                                                      | 1                                   | 2                          | 3                | 4                         | 99                                               |
| <i>i) Improve local sewage management</i>                                                                                     | 1                                   | 2                          | 3                | 4                         | 99                                               |
| <i>j) Improve / provide drinking water facilities</i>                                                                         | 1                                   | 2                          | 3                | 4                         | 99                                               |
| <i>k) Improve household waste collection/handling</i>                                                                         | 1                                   | 2                          | 3                | 4                         | 99                                               |
| <i>l) Better infrastructure support (e.g. roads/quays etc.)</i>                                                               | 1                                   | 2                          | 3                | 4                         | 99                                               |
| <i>m) Improve electricity supplies</i>                                                                                        | 1                                   | 2                          | 3                | 4                         | 99                                               |
| <i>n) Improve internet services</i>                                                                                           | 1                                   | 2                          | 3                | 4                         | 99                                               |
| <b>Land/coastal management</b>                                                                                                |                                     |                            |                  |                           |                                                  |
| <i>o) Improve controls on farming practices that affect the marine environment (e.g. chemical use/animal waste)</i>           | 1                                   | 2                          | 3                | 4                         | 99                                               |
| <i>p) Stop forest slash and burn clearance</i>                                                                                | 1                                   | 2                          | 3                | 4                         | 99                                               |
| <i>q) Improve policing of existing fishing (and other) laws/ordinances</i>                                                    | 1                                   | 2                          | 3                | 4                         | 99                                               |
| <i>r) Introduce new laws to deter unsustainable fishing/ bad practices</i>                                                    | 1                                   | 2                          | 3                | 4                         | 99                                               |
| <i>s) Better management and enforcement of marine protected area</i>                                                          | 1                                   | 2                          | 3                | 4                         | 99                                               |
| <i>t) Stop anchoring boats in coral/mangrove/seagrass areas</i>                                                               | 1                                   | 2                          | 3                | 4                         | 99                                               |
| <i>u) Promote and support sustainable tourism</i>                                                                             | 1                                   | 2                          | 3                | 4                         | 99                                               |
| <i>v) Build awareness, independence and resilience of local communities to better manage their own affairs</i>                | 1                                   | 2                          | 3                | 4                         | 99                                               |

## Section 6: Perceptions of the marine environment in Kabupaten Selayar

In this section we would like you to think about Kabupaten Selayar, how has it changed over the last 10 years, what do you think will happen in the next 10 years. In particular we would like you to think of the following activities:

| Q19) Compared to now, would you say the state of the following features <u>10 years ago (e.g. 2010)</u> in Kabupaten Selayar is better, worse the same? | Much worse | Slightly worse | same | Slightly better | Much better | Don't know/<br>prefer not to answer | Not applicable |
|---------------------------------------------------------------------------------------------------------------------------------------------------------|------------|----------------|------|-----------------|-------------|-------------------------------------|----------------|
|                                                                                                                                                         | (1)        | (2)            | (3)  | (4)             | (5)         |                                     |                |
| <b><u>Resources</u></b>                                                                                                                                 |            |                |      |                 |             |                                     |                |
| a) Amount (number) and diversity of wild fish and shellfish,                                                                                            | 1          | 2              | 3    | 4               | 5           | 99                                  | 0              |
| <b><u>Habitats</u></b>                                                                                                                                  |            |                |      |                 |             |                                     |                |
| b) Quality of coral reefs, diversity of coral types                                                                                                     | 1          | 2              | 3    | 4               | 5           | 99                                  | 0              |
| c) Seagrass coverage, number of seagrass species                                                                                                        | 1          | 2              | 3    | 4               | 5           | 99                                  | 0              |
| d) Mangrove coverage, diversity of mangrove types                                                                                                       | 1          | 2              | 3    | 4               | 5           | 99                                  | 0              |
| e) Other beach tree cover                                                                                                                               | 1          | 2              | 3    | 4               | 5           | 99                                  | 0              |
| <b><u>Water quality</u></b>                                                                                                                             |            |                |      |                 |             |                                     |                |
| f) The amount of plastics/rubbish in the water                                                                                                          | 1          | 2              | 3    | 4               | 5           | 99                                  | 0              |
| g) The supply of clean drinking water                                                                                                                   | 1          | 2              | 3    | 4               | 5           | 99                                  | 0              |
| <b><u>Other issues</u></b>                                                                                                                              |            |                |      |                 |             |                                     |                |
| h) Other issues you would like to discuss                                                                                                               | .....      |                |      |                 |             |                                     |                |

| Q20) Compared to now, how do you see the state of the following features in Kabupaten Selayar in the future in 10 years' time (e.g. 2030)? | Much worse | Slightly worse | same | Slightly better | Much better | Don't know/<br>prefer not to answer | Not applicable |
|--------------------------------------------------------------------------------------------------------------------------------------------|------------|----------------|------|-----------------|-------------|-------------------------------------|----------------|
|                                                                                                                                            | (1)        | (2)            | (3)  | (4)             | (5)         |                                     |                |
| <b><u>Resources</u></b>                                                                                                                    |            |                |      |                 |             |                                     |                |
| a) Amount (number) and diversity of wild fish and shellfish                                                                                | 1          | 2              | 3    | 4               | 5           | 99                                  | 0              |
| <b><u>Habitats</u></b>                                                                                                                     |            |                |      |                 |             |                                     |                |
| b) Quality of coral reefs, diversity of coral types                                                                                        | 1          | 2              | 3    | 4               | 5           | 99                                  | 0              |
| c) Seagrass coverage, number of seagrass species                                                                                           | 1          | 2              | 3    | 4               | 5           | 99                                  | 0              |
| d) Mangrove coverage, diversity of mangrove type                                                                                           | 1          | 2              | 3    | 4               | 5           | 99                                  | 0              |
| e) Other beach tree cover                                                                                                                  | 1          | 2              | 3    | 4               | 5           | 99                                  | 0              |
| <b><u>Water quality</u></b>                                                                                                                |            |                |      |                 |             |                                     |                |
| f) The amount of plastics/rubbish in the water                                                                                             | 1          | 2              | 3    | 4               | 5           | 99                                  | 0              |
| g) The supply of clean drinking water                                                                                                      | 1          | 2              | 3    | 4               | 5           | 99                                  | 0              |
| <b><u>Other issues</u></b>                                                                                                                 |            |                |      |                 |             |                                     |                |
| h) Other issues you would like to discuss                                                                                                  | .....      |                |      |                 |             |                                     |                |



## Section 7: What do you think is affecting the marine environment in Kabupaten Selayar

In this section we would like you think of what is happening in and around Kabupaten Selayar, which is affecting the quality of the local environment:

| Q21) How have the following issues changed the quality of the local coastal environment (for better or worse)? | Made it worse | No Impact | Made it better | Don't know/<br>prefer not to answer |
|----------------------------------------------------------------------------------------------------------------|---------------|-----------|----------------|-------------------------------------|
|                                                                                                                | (1)           | (2)       | (3)            |                                     |
| <b><u>Marine issues</u></b>                                                                                    |               |           |                |                                     |
| a) Overfishing by the local community                                                                          | 1             | 2         | 3              | 99                                  |
| b) Disputes due to fishing/fishers from other municipalities                                                   | 1             | 2         | 3              | 99                                  |
| c) Fishing by commercial (large-scale) fisheries                                                               | 1             | 2         | 3              | 99                                  |
| d) Destructive fishing practices (dynamite/cyanide)                                                            | 1             | 2         | 3              | 99                                  |
| e) Aquaculture (incl. fish cages, mussel lines, seaweed, pearl)                                                | 1             | 2         | 3              | 99                                  |
| f) Live fish trade                                                                                             | 1             | 2         | 3              | 99                                  |
| g) Gleaning (low tide searching for crustaceans etc.)                                                          | 1             | 2         | 3              | 99                                  |
| h) Mangrove/nypa harvesting for charcoal/building                                                              | 1             | 2         | 3              | 99                                  |
| i) More storms at sea due to climate change                                                                    | 1             | 2         | 3              | 99                                  |
| j) More floods and erosion due to climate change                                                               | 1             | 2         | 3              | 99                                  |
| <b><u>Land based issues</u></b>                                                                                |               |           |                |                                     |
| k) Land use change (e.g. slash & burn)                                                                         | 1             | 2         | 3              | 99                                  |
| l) Intensification of farming (e.g. use of inorganic/chemicals)                                                | 1             | 2         | 3              | 99                                  |
| m) Local population growth/migration                                                                           | 1             | 2         | 3              | 99                                  |
| n) Tourism                                                                                                     | 1             | 2         | 3              | 99                                  |
| o) Poor waste management (solid/liquid/agricultural etc.)                                                      | 1             | 2         | 3              | 99                                  |
| p) Poor plastic waste management                                                                               | 1             | 2         | 3              | 99                                  |
| q) Supporting alternatives livelihoods to fishing                                                              | 1             | 2         | 3              | 99                                  |
| r) Infrastructure development (e.g. new fish landing sites)                                                    | 1             | 2         | 3              | 99                                  |
| <b><u>Environmental management</u></b>                                                                         |               |           |                |                                     |
| s) National political will & environmental protection laws/ordinances                                          | 1             | 2         | 3              | 99                                  |
| t) The enforcement of environmental laws/ordinances                                                            | 1             | 2         | 3              | 99                                  |
| u) Local communities/stakeholders calling for better protection/management of the local marine environment     | 1             | 2         | 3              | 99                                  |
| v) Research by NGOs and local researchers                                                                      | 1             | 2         | 3              | 99                                  |
| <b><u>Social Issues</u></b>                                                                                    |               |           |                |                                     |
| w) Increase of financial debt                                                                                  | 1             | 2         | 3              | 99                                  |
| x) Income gaps between communities or neighbourhoods                                                           | 1             | 2         | 3              | 99                                  |

**BLUE COMMUNITIES SURVEY - STUDI KASUS INDONESIA**  
**(VERSI BAHASA INDONESIA)**

**Bagian 1: Tentang Anda**

*Pada bagian ini kami akan menanyakan beberapa hal mengenai Anda untuk memahami persepsi dari berbagai kelompok masyarakat mengenai isu kelautan. Seluruh informasi yang Anda berikan adalah rahasia.*

**Pewawancara mohon tuliskan: Jenis Kelamin (Laki-laki / Perempuan)**

**diisi oleh pewawancara: Nama Desa** \_\_\_\_\_

**Pewawancara mohon catat kondisi cuaca:** \_\_\_\_\_  
(cerah; cerah-berawan; berawan; hujan rintik; hujan; hujan deras)

**Q1) Berapakah umur Anda?** \_\_\_\_\_ tahun.

**Q2a) Seberapa jauhkah Anda tinggal dari pantai/laut)?**

- Tinggal di rumah apung;
- Dalam jarak 1 km
- 1 – 2 km
- 2 – 5 km
- 5 – 10 km dst.
- memilih tidak menjawab

**Q2b) Berapa lama kira-kira waktu yang dibutuhkan untuk berjalan ke pantai/laut?** \_\_\_\_\_ menit

**Q3) Apakah Anda atau anggota keluarga Anda melakukan berbagai kegiatan/bekerja seperti di bawah ini (mohon pilih semua yang sesuai)?**

- Memancing di laut untuk dijual ke pasar
- Memancing / *gleaning* untuk konsumsi keluarga
- Budidaya (ikan/kerang/rumput laut)
- Pengiriman dengan kapal (termasuk barang komoditas dan penumpang)
- Pariwisata pesisir dan laut (misalnya: kapal turis, memandu turis di pantai, memandu berenang dan snorkelling)
- Pengelolaan wilayah pesisir (misalnya: perlindungan pesisir, pengolahan air limbah)
- Perlindungan wilayah laut dan pesisir (misalnya kelompok masyarakat, pemerintahan, LSM)
- Penelitian atau perumusan kebijakan di wilayah laut dan pesisir
- Tidak ada satupun diatas (*Tidak ada satupun anggota keluarga Saya yang bekerja di sektor maritim*)
- Tidak tahu / Memilih untuk tidak menjawab
- Lainnya (Sebutkan \_\_\_\_\_)

**Q4) Apakah Anda memiliki akses terhadap fasilitas memancing seperti di bawah ini:**

- Kapal atau sampan untuk memancing
- Alat tangkap (jaring, perangkap, dll)
- Peralatan tambahan (GPS, aplikasi lainnya)
- Kapal lainnya (misalnya untuk memandu turis, mengangkut bahan dan orang)
- Tidak ada satupun di atas

**Q5) Apakah Anda mendapatkan penghasilan dari berbagai kegiatan di bawah ini?**

- Menangkap ikan
- Mencari kepiting, kerang atau udang
- Budidaya perikanan
- Budidaya rumput laut
- Pemrosesan hasil tangkap (misalnya pengasinan, pengeringan, dll)
- Mengantar/memandu turis dan pengunjung menggunakan kapal, etc.
- Lainnya (Sebutkan \_\_\_\_\_)

**Q6) Kira-kira berapa penghasilan Anda dalam 1 bulan?**

- ..... Rupiah

***Kami ingin mengetahui lebih dalam mengenai tempat tinggal Anda dan dengan siapa Anda tinggal:***

**Q7a) Ada berapa orang dewasa diatas 18 tahun [N] yang tinggal bersama Anda?**

- N = ..... (orang)
- Memilih untuk tidak menjawab

**Q7b) Ada berapa anak yang tinggal bersama Anda?**

- N = ..... (orang)
- Memilih untuk tidak menjawab

**Q7c) Apakah Anda tinggal dengan keluarga lain (orang tua/saudara)?**

- Ya
- Tidak
- Memilih untuk tidak menjawab

**Q8a) Terbuat dari apakah bangunan rumah Anda? :**

- Semen, batu, batu bata
- Kayu, bambu, kayu bakau, atau bahan alam lainnya
- Bahan daur ulang – plastik, terpal, dll

**Q8b) Manakah dari pernyataan berikut yang paling tepat mengenai tempat tinggal Anda:**

- Rumah dan tanah milik saya sendiri
- Rumah milik saya sendiri tetapi tanahnya meminjam (tidak membayar)
- Rumah milik saya sendiri tetapi tanahnya menyewa
- Rumah dan tanah menyewa
- Saya tinggal di lahan tak bertuan
- Lainnya .....

**Q8c) Pernyataan manakah yang tepat menjelaskan kondisi kamar mandi tempat tinggal Anda?):**

- Fasilitas MCK terdapat di dalam atau pekarangan rumah dan digunakan untuk pribadi atau keluarga sendiri
- Fasilitas MCK –yang digunakan secara umum
- Saya tidak memiliki akses terhadap fasilitas MCK

**Q8d) Bagaimanakah sistem pembuangan fasilitas MCK / toilet Anda?):**

- WC dengan penampung air dan saluran tangki septik
- WC tanpa penampung air dengan saluran tangki septik
- Tanpa WC namun tertutup (missal, lubang tertutup)

- Tanpa WC dan terbuka

**Q9) Sumber listrik di rumah Anda**

- Sambungan listrik PLN
- Generator umum / warga dengan solar diesel
- Generator pribadi dengan solar diesel
- Panel surya umum / warga
- Panel surya milik pribadi

**Dan yang terakhir mengenai latar belakang dan afiliasi Anda:**

**Q10) Level pendidikan terakhir**

- Tidak tamat SD
- Tidak tamat SMP
- Tidak tamat SMA
- Tidak tamat Kuliah/Universitas
- Tamat SD
- Tamat SMP
- Tamat SMA
- Tamat Kuliah / Universitas

**Q11) Latar belakang etnis Anda?**

- Bugis
- Jawa
- Bajo
- Tiongkok
- Flores
- Selayar

**Q12) Apakah agama yang Anda panut?**

- Islam
- Kristen Protestan
- Katolik
- Budha
- Hindu
- Kepercayaan lainnya (Confucian)

**Q13) Apakah Anda merokok?**

- Ya
- Tidak
- Saat ini merokok, tetapi dulu pernah mencoba berhenti
- Sudah berhenti – berapa lama.....

**Jika Anda menjawab Ya, berapa banyak biasanya Anda merokok dalam satu hari?**

- Kurang dari 1 bungkus
  - 1 sampai 3 bungkus
  - 4 sampai 6 bungkus
  - 7 bungkus atau lebih
- Pewawancara tandai jumlah batang dalam 1 bungkus = .....

**Jika menjawab Ya, apa tipe rokok Anda?**

- Vape
- Rokok dengan filter bukan kretek
- Rokok linting atau rokok tanpa filter
- Rokok kretek atau rokok linting herbal lainnya
- Lainnya .....

**Jika Anda menjawab Tidak, apakah Anda biasanya terkena/terpapar asap rokok dari orang-orang di sekitar Anda selama lebih dari 15 menit per hari)?**

- Tidak
- Ya

**Q14) Bagaimanakah Anda membuang sampah Anda?**

Dibuang ke Tempat Pembuangan Sementara (TPS) dan diambil oleh petugas sampah.

*Jika Anda menjawab Ya pada jawaban ini, berapa kali dalam seminggu sampah Anda diambil petugas? .....*

- Dikubur
- Dibakar
- dibuang di lahan atau lubang terbuka/kosong
- Dibuang ke laut/sungai
- Lainnya.....

**Q15) Apakah Anda melakukan pemilahan pada sampah Anda?**

- Tidak
- Ya

**Q16) Apakah Anda memiliki asuransi kesehatan?**

- Ya, saya memiliki BPJS
- Ya, saya memiliki asuransi kesehatan lainnya
- Tidak

## **Bagian 2: Interaksi Anda dengan wilayah pesisir dan laut**

Dalam bagian ini kami ingin menggali lebih dalam aktivitas apa sajakah yang pernah Anda lakukan di sekitar wilayah pesisir dalam seminggu terakhir:

| Q16) Dalam satu minggu (7 hari) terakhir, berapa banyak Anda melakukan kegiatan di bawah ini?    | Jumlah hari    |   |   |   |   |   |   | Tidak tahu/<br>memilih<br>untuk<br>tidak<br>menjawab |    |
|--------------------------------------------------------------------------------------------------|----------------|---|---|---|---|---|---|------------------------------------------------------|----|
|                                                                                                  | Tidak ada<br>0 | 1 | 2 | 3 | 4 | 5 | 6 |                                                      | 7  |
| <b>Livelihoods</b>                                                                               |                |   |   |   |   |   |   |                                                      |    |
| a) Pergi melaut menangkap ikan untuk kebutuhan pangan dan penghasilan                            | 0              | 1 | 2 | 3 | 4 | 5 | 6 | 7                                                    | 99 |
| b) Pergi memancing kepiting, udang, kerang, lobster, dll                                         | 0              | 1 | 2 | 3 | 4 | 5 | 6 | 7                                                    | 99 |
| c) Pergi memungut (gleaning) pada saat surut                                                     | 0              | 1 | 2 | 3 | 4 | 5 | 6 | 7                                                    | 99 |
| d) Melakukan aktivitas budidaya perikanan (ikan, kerang, dll)                                    | 0              | 1 | 2 | 3 | 4 | 5 | 6 | 7                                                    | 99 |
| e) Melakukan aktivitas budidaya rumput laut                                                      | 0              | 1 | 2 | 3 | 4 | 5 | 6 | 7                                                    | 99 |
| f) Melakukan kegiatan pasca panen (contoh: pengeringan ikan, pengasinan ikan, dll).              | 0              | 1 | 2 | 3 | 4 | 5 | 6 | 7                                                    | 99 |
| g) Mengambil kayu atau buah dari hutan bakau                                                     | 0              | 1 | 2 | 3 | 4 | 5 | 6 | 7                                                    | 99 |
| h) Mengambil bahan makanan dari alam (contoh: madu, kelapa, dll)                                 | 0              | 1 | 2 | 3 | 4 | 5 | 6 | 7                                                    | 99 |
| i) Menjual hasil tangkap atau bahan lainnya                                                      | 0              | 1 | 2 | 3 | 4 | 5 | 6 | 7                                                    | 99 |
| j) Memandu turis atau pengunjung dengan kapal                                                    | 0              | 1 | 2 | 3 | 4 | 5 | 6 | 7                                                    | 99 |
| <b>Day-to-day living</b>                                                                         |                |   |   |   |   |   |   |                                                      |    |
| k) Mandi atau memandikan anak di pantai/laut                                                     | 0              | 1 | 2 | 3 | 4 | 5 | 6 | 7                                                    | 99 |
| l) Mencuci piring atau baju di pantai/laut                                                       | 0              | 1 | 2 | 3 | 4 | 5 | 6 | 7                                                    | 99 |
| m) Memakan ikan yang ditangkap langsung atau dipancing langsung                                  | 0              | 1 | 2 | 3 | 4 | 5 | 6 | 7                                                    | 99 |
| n) Memakan kerang-kerangan yang ditangkap langsung atau dipancing langsung                       | 0              | 1 | 2 | 3 | 4 | 5 | 6 | 7                                                    | 99 |
| o) Menebang pohon bakau dan membuat arang                                                        | 0              | 1 | 2 | 3 | 4 | 5 | 6 | 7                                                    | 99 |
| p) Menaiki kapal untuk pergi ke pulau lainnya                                                    | 0              | 1 | 2 | 3 | 4 | 5 | 6 | 7                                                    | 99 |
| q) Pergi berenang atau menyelam untuk bersenang-senang                                           | 0              | 1 | 2 | 3 | 4 | 5 | 6 | 7                                                    | 99 |
| r) Melihat mamalia laut, reptile dan burung                                                      | 0              | 1 | 2 | 3 | 4 | 5 | 6 | 7                                                    | 99 |
| s) Berjalan-jalan, bermain atau berekreasi di bibir pantai                                       | 0              | 1 | 2 | 3 | 4 | 5 | 6 | 7                                                    | 99 |
| <b>Environmental management</b>                                                                  |                |   |   |   |   |   |   |                                                      |    |
| t) Melakukan kegiatan bersih-bersih atau memungut sampah di pantai                               | 0              | 1 | 2 | 3 | 4 | 5 | 6 | 7                                                    | 99 |
| u) Melakukan kegiatan konservasi laut (contoh: menanam bakau)                                    | 0              | 1 | 2 | 3 | 4 | 5 | 6 | 7                                                    | 99 |
| v) Melakukan patroli di laut                                                                     | 0              | 1 | 2 | 3 | 4 | 5 | 6 | 7                                                    | 99 |
| w) Berpartisipasi dalam kegiatan diskusi ataupun pertemuan mengenai pengelolaan laut dan pesisir | 0              | 1 | 2 | 3 | 4 | 5 | 6 | 7                                                    | 99 |

### Bagian 3: Lingkungan pesisir dan laut, serta kesehatan dan kesejahteraan Anda

Dalam bagian ini kami mengajak Anda untuk mengingat mengenai kondisi kesehatan dan kesejahteraan Anda yang diakibatkan oleh menghabiskan waktu di wilayah pesisir dan sekitarnya selama sebulan terakhir (4 minggu), dan apakah Anda membicarakan kondisi tersebut kepada petugas kesehatan.

|                                                                                                                                                                                    | Tidak | Ya –<br>tetapi<br>tidak<br>diketahui<br>petugas<br>kesehatan | Ya +<br>diketahui<br>petugas<br>kesehatan | Tidak<br>tahu/<br>memilih<br>untuk<br>tidak<br>menjawab |
|------------------------------------------------------------------------------------------------------------------------------------------------------------------------------------|-------|--------------------------------------------------------------|-------------------------------------------|---------------------------------------------------------|
| Q17) Dalam satu bulan (4 minggu) terakhir apakah Anda merasakan beberapa permasalahan kesehatan di bawah ini yang diakibatkan dari menghabiskan waktu di wilayah pesisir dan laut? |       |                                                              |                                           |                                                         |
| <b>Berhubungan langsung dengan kelautan</b>                                                                                                                                        |       |                                                              |                                           |                                                         |
| a) Teriris/tersengat/tergigit oleh sesuatu di dalam air atau sekitarnya                                                                                                            | 0     | 1                                                            | 2                                         | 99                                                      |
| b) Terjangkit parasit (cacing, serangga, dll) dari pasir atau air pantai                                                                                                           | 0     | 1                                                            | 2                                         | 99                                                      |
| c) Mengalami kesulitan di dalam air (contoh: kram ketika berenang atau hampir tenggelam)                                                                                           | 0     | 1                                                            | 2                                         | 99                                                      |
| d) Mengalami kesulitan ketika menyelam (contoh: dekompresi, dll)                                                                                                                   | 0     | 1                                                            | 2                                         | 99                                                      |
| e) Mengalami sakit karena terbakar matahari (contoh: kulit perih, pingsan, dll)                                                                                                    | 0     | 1                                                            | 2                                         | 99                                                      |
| <b>Kondisi kesehatan secara umum</b>                                                                                                                                               |       |                                                              |                                           |                                                         |
| f) Tidak cukup makan (misalnya karena tangkapan ikan sedikit, atau tidak ada pemasukan)                                                                                            | 0     | 1                                                            | 2                                         | 99                                                      |
| g) Tidak dapat cukup minum dan bersanitasi (mandi, sikat gigi, cuci) karena kurang air bersih                                                                                      | 0     | 1                                                            | 2                                         | 99                                                      |
| h) Muntah, diare atau sakit perut                                                                                                                                                  | 0     | 1                                                            | 2                                         | 99                                                      |
| i) Mengalami demam atau sakit kepala                                                                                                                                               | 0     | 1                                                            | 2                                         | 99                                                      |
| j) Mengalami demam berdarah                                                                                                                                                        | 0     | 1                                                            | 2                                         | 99                                                      |
| k) Mengalami kram di kaki atau bagian tubuh lainnya                                                                                                                                | 0     | 1                                                            | 2                                         | 99                                                      |
| l) Mengalami sakit pada otot atau bagian tubuh lainnya                                                                                                                             | 0     | 1                                                            | 2                                         | 99                                                      |
| m) Mengalami hilang nafsu makan                                                                                                                                                    | 0     | 1                                                            | 2                                         | 99                                                      |
| n) Merasa lelah, lemah dan lesu                                                                                                                                                    | 0     | 1                                                            | 2                                         | 99                                                      |
| o) Mengalami sakit di telinga atau infeksi telinga                                                                                                                                 | 0     | 1                                                            | 2                                         | 99                                                      |
| p) Mengalami sakit mata, infeksi mata atau pandangan terganggu                                                                                                                     | 0     | 1                                                            | 2                                         | 99                                                      |
| q) Mendapat sakit kulit (contoh: gatal, kemerahan dan reaksi alergi lainnya)                                                                                                       | 0     | 1                                                            | 2                                         | 99                                                      |
| r) Mengalami infeksi saluran kencing                                                                                                                                               | 0     | 1                                                            | 2                                         | 99                                                      |
| s) Mengalami kesulitan bernafas/batuk/infeksi saluran/permasalahan saluran pernafasan lainnya (misalnya asma)                                                                      | 0     | 1                                                            | 2                                         | 99                                                      |
| t) Mengalami kehilangan pendengaran                                                                                                                                                | 0     | 1                                                            | 2                                         | 99                                                      |
| u) Mengalami stroke atau permasalahan saraf lainnya                                                                                                                                | 0     | 1                                                            | 2                                         | 99                                                      |
| v) Mengalami kelumpuhan                                                                                                                                                            | 0     | 1                                                            | 2                                         | 99                                                      |
| w) Mengalami kecemasan, stress atau depresi                                                                                                                                        | 0     | 1                                                            | 2                                         | 99                                                      |
| x) Mengalami kesulitan tidur                                                                                                                                                       | 0     | 1                                                            | 2                                         | 99                                                      |
| y) Adakah kondisi lainnya yang ingin didiskusikan?                                                                                                                                 | ..... |                                                              |                                           |                                                         |

#### Bagian 4: SF-12®

#### Bagian 5: Seberapa besarkah menurut Anda hal-hal di bawah ini terhadap kesehatan dan kesejahteraan?

*Dalam bagian ini kami mengajak Anda untuk menilai seberapa pentingkah beberapa hal di bawah ini terhadap kesehatan dan kesejahteraan masyarakat setempat?*

| Q18) Menurut Anda, seberapa pentingkah faktor-faktor di bawah ini terhadap kesehatan dan kesejahteraan masyarakat lokal? | <i>Tidak Penting</i> | <i>Kurang Penting</i> | <i>Penting</i> | <i>Sangat Penting</i> | <i>Tidak tahu/Memilih untuk tidak menjawab</i> |
|--------------------------------------------------------------------------------------------------------------------------|----------------------|-----------------------|----------------|-----------------------|------------------------------------------------|
|                                                                                                                          | (1)                  | (2)                   | (3)            | (4)                   |                                                |
| <b>Pelayanan kesehatan</b>                                                                                               |                      |                       |                |                       |                                                |
| a) Meningkatkan pemahaman dan kesadaran masyarakat tentang bagaimana menjaga kesehatan diri                              | 1                    | 2                     | 3              | 4                     | 99                                             |
| b) Memadukan pengobatan tradisional dan modern                                                                           | 1                    | 2                     | 3              | 4                     | 99                                             |
| c) Mengajarkan renang kepada anak-anak                                                                                   | 1                    | 2                     | 3              | 4                     | 99                                             |
| d) Memberikan pelatihan kepada pekerja kesehatan lokal                                                                   | 1                    | 2                     | 3              | 4                     | 99                                             |
| e) Membangun klinik kesehatan dengan peralatan dan fasilitas yang lebih lengkap                                          | 1                    | 2                     | 3              | 4                     | 99                                             |
| f) Meningkatkan jumlah dokter/perawat/bidan                                                                              | 1                    | 2                     | 3              | 4                     | 99                                             |
| <b>Fasilitas dan infrastruktur</b>                                                                                       |                      |                       |                |                       |                                                |
| g) Memperbaiki fasilitas pemukiman                                                                                       | 1                    | 2                     | 3              | 4                     | 99                                             |
| h) Memberikan lahan khusus bagi rumah-rumah tanpa izin / non-permanen                                                    | 1                    | 2                     | 3              | 4                     | 99                                             |
| i) Memperbaiki pengelolaan air buangan domestik                                                                          | 1                    | 2                     | 3              | 4                     | 99                                             |
| j) Memperbaiki / menyediakan fasilitas air bersih                                                                        | 1                    | 2                     | 3              | 4                     | 99                                             |
| k) Memperbaiki pengelolaan sampah domestik                                                                               | 1                    | 2                     | 3              | 4                     | 99                                             |
| l) Perbaikan /pembangunan infrastruktur (jalan, pelabuhan, dll)                                                          | 1                    | 2                     | 3              | 4                     | 99                                             |
| m) Memperbaiki / menyediakan fasilitas pengaliran listrik                                                                | 1                    | 2                     | 3              | 4                     | 99                                             |
| n) Memperbaiki/menyediakan sambungan internet                                                                            | 1                    | 2                     | 3              | 4                     | 99                                             |
| <b>Manajemen lahan pesisir</b>                                                                                           |                      |                       |                |                       |                                                |
| o) Memperbaiki control terhadap penggunaan bahan atau metode pertanian yang merusak laut (contoh: pupuk, pestisida, dll) | 1                    | 2                     | 3              | 4                     | 99                                             |
| p) Melarang penebangan hutan (termasuk bakau) untuk membuka lahan                                                        | 1                    | 2                     | 3              | 4                     | 99                                             |
| q) Memperbaiki kebijakan, peraturan dan perundangan mengenai sumber daya perikanan                                       | 1                    | 2                     | 3              | 4                     | 99                                             |
| r) Membuat peraturan baru mengenai penggunaan alat tangkap atau metode penangkapan destruktif                            | 1                    | 2                     | 3              | 4                     | 99                                             |
| s) Memperbaiki pengelolaan dan penegakan hukum di wilayah perlindungan laut                                              | 1                    | 2                     | 3              | 4                     | 99                                             |
| t) Melarang pemilik kapal untuk menjangkarkan kapalnya di wilayah terumbu karang/bakau/lamun                             | 1                    | 2                     | 3              | 4                     | 99                                             |
| u) Mempromosikan dan mendukung program pariwisata berkelanjutan                                                          | 1                    | 2                     | 3              | 4                     | 99                                             |
| v) Membangun kesadaran, kemandirian dan ketahanan lokal untuk mengelola permasalahan dan kepentingannya                  | 1                    | 2                     | 3              | 4                     | 99                                             |



**Bagian 6: Persepsi terhadap kondisi lingkungan pesisir dan pantai di Kabupaten Selayar**

Pada bagian ini kami bermaksud untuk meminta pendapat Anda mengenai perubahan kondisi lingkungan pesisir dan laut yang terjadi di Kabupaten Selayar jika dibandingkan dengan 10 tahun yang lalu, dan pendapat Anda apa yang akan terjadi di daerah ini dalam 10 tahun kedepan. Khususnya kami ingin mengetahui pendapat Anda untuk berbagai hal di bawah ini:

| Q19) Dibandingkan saat ini, menurut Anda perubahan lingkungan di pesisir dan laut yang terjadi 10 tahun yang lalu (2010) di Kabupaten Selayar apakah menjadi lebih baik, lebih buruk atau sama saja? | Lebih buruk | Sedikit lebih buruk | sama | Sedikit lebih baik | Lebih baik | Tidak tahu/memilih untuk tidak menjawab | Tidak dapat diterapkan |
|------------------------------------------------------------------------------------------------------------------------------------------------------------------------------------------------------|-------------|---------------------|------|--------------------|------------|-----------------------------------------|------------------------|
|                                                                                                                                                                                                      | (1)         | (2)                 | (3)  | (4)                | (5)        |                                         |                        |
| <b>Sumber daya</b>                                                                                                                                                                                   |             |                     |      |                    |            |                                         |                        |
| a) Jumlah (kuantitas) dan variasi jenis ikan, kerang, dll                                                                                                                                            | 1           | 2                   | 3    | 4                  | 5          | 99                                      | 0                      |
| <b>Habitat</b>                                                                                                                                                                                       |             |                     |      |                    |            |                                         |                        |
| b) Kualitas terumbu karang dan variasi jenis terumbu karang                                                                                                                                          | 1           | 2                   | 3    | 4                  | 5          | 99                                      | 0                      |
| c) Tutupan lamun dan varietas spesies/jenisnya                                                                                                                                                       | 1           | 2                   | 3    | 4                  | 5          | 99                                      | 0                      |
| d) Tutupan bakau dan varietas spesies/jenisnya                                                                                                                                                       | 1           | 2                   | 3    | 4                  | 5          | 99                                      | 0                      |
| e) Jumlah dan variasi jenis pepohonan lainnya                                                                                                                                                        | 1           | 2                   | 3    | 4                  | 5          | 99                                      | 0                      |
| <b>Kualitas air</b>                                                                                                                                                                                  |             |                     |      |                    |            |                                         |                        |
| f) Jumlah plastik / sampah di perairan                                                                                                                                                               | 1           | 2                   | 3    | 4                  | 5          | 99                                      | 0                      |
| g) Ketersediaan air bersih / air minum                                                                                                                                                               | 1           | 2                   | 3    | 4                  | 5          | 99                                      | 0                      |
| <b>Isu lainnya</b>                                                                                                                                                                                   |             |                     |      |                    |            |                                         |                        |
| h) Adakah isu lainnya yang ingin Anda diskusikan?                                                                                                                                                    | .....       |                     |      |                    |            |                                         |                        |

| Q20) Dibandingkan dengan saat ini, bagaimana menurut Anda mengenai kondisi lingkungan di wilayah Kabupaten Selayar dalam waktu 10 tahun mendatang (2030)? | Lebih buruk | Sedikit lebih buruk | sama | Sedikit lebih baik | Lebih baik | Tidak tahu/memilih untuk tidak menjawab | Tidak dapat diterapkan |
|-----------------------------------------------------------------------------------------------------------------------------------------------------------|-------------|---------------------|------|--------------------|------------|-----------------------------------------|------------------------|
|                                                                                                                                                           | (1)         | (2)                 | (3)  | (4)                | (5)        |                                         |                        |
| <b>Sumber daya</b>                                                                                                                                        |             |                     |      |                    |            |                                         |                        |
| a) Jumlah (kuantitas) dan variasi jenis ikan, kerang, dll                                                                                                 | 1           | 2                   | 3    | 4                  | 5          | 99                                      | 0                      |
| <b>Habitat</b>                                                                                                                                            |             |                     |      |                    |            |                                         |                        |
| b) Kualitas terumbu karang dan variasi jenis terumbu karang                                                                                               | 1           | 2                   | 3    | 4                  | 5          | 99                                      | 0                      |
| c) Tutupan lamun dan varietas spesies/jenisnya                                                                                                            | 1           | 2                   | 3    | 4                  | 5          | 99                                      | 0                      |
| d) Tutupan bakau dan varietas spesies/jenisnya                                                                                                            | 1           | 2                   | 3    | 4                  | 5          | 99                                      | 0                      |
| e) Jumlah dan variasi jenis pepohonan lainnya                                                                                                             | 1           | 2                   | 3    | 4                  | 5          | 99                                      | 0                      |
| <b>Kualitas Air</b>                                                                                                                                       |             |                     |      |                    |            |                                         |                        |
| f) Jumlah plastik / sampah di perairan                                                                                                                    | 1           | 2                   | 3    | 4                  | 5          | 99                                      | 0                      |
| g) Ketersediaan air bersih / air minum                                                                                                                    | 1           | 2                   | 3    | 4                  | 5          | 99                                      | 0                      |
| <b>Isu Lainnya</b>                                                                                                                                        |             |                     |      |                    |            |                                         |                        |
| h) Adakah isu lainnya yang ingin Anda diskusikan?                                                                                                         | .....       |                     |      |                    |            |                                         |                        |

**Bagian 7: Menurut pendapat Anda, faktor-faktor apakah yang mempengaruhi kondisi lingkungan pesisir dan laut di wilayah Kabupaten Selayar?**

Dalam bagian ini kami meminta Anda untuk mengingat kembali apakah yang telah terjadi di wilayah Kabupaten Selayar dan sekitarnya yang menyebabkan perubahan kualitas lingkungan pesisir dan lautnya?

| Q21) Menurut Anda, bagaimana isu-isu di bawah ini mempengaruhi kondisi lingkungan pesisir dan laut di Kabupaten Selayar (memperburuk atau memperbaiki)? | Memperburuk<br>(1) | Tidak berpengaruh<br>(2) | Memperbaiki<br>(3) | Tidak tahu/memilih untuk tidak menjawab |
|---------------------------------------------------------------------------------------------------------------------------------------------------------|--------------------|--------------------------|--------------------|-----------------------------------------|
| <b>Isu kelautan dan perikanan</b>                                                                                                                       |                    |                          |                    |                                         |
| a) Penangkapan ikan berlebih / terus-menerus oleh masyarakat local                                                                                      | 1                  | 2                        | 3                  | 99                                      |
| b) Konflik dengan nelayan yang datang dari wilayah lain untuk memancing di wilayah Anda                                                                 | 1                  | 2                        | 3                  | 99                                      |
| c) Penangkapan ikan oleh kapal besar / kapal komersial                                                                                                  | 1                  | 2                        | 3                  | 99                                      |
| d) Penggunaan alat tangkap yang merusak (bom, bius)                                                                                                     | 1                  | 2                        | 3                  | 99                                      |
| e) Budidaya perikanan (termasuk keramba, kerang, rumput laut, mutiara, dll)                                                                             | 1                  | 2                        | 3                  | 99                                      |
| f) Perdagangan ikan hidup                                                                                                                               | 1                  | 2                        | 3                  | 99                                      |
| g) Kegiatan memungut (misalnya mengambil krustasea saat air surut, dll)                                                                                 | 1                  | 2                        | 3                  | 99                                      |
| h) Pengambilan kayu bakau sebagai kayu bakar atau bahan bangunan                                                                                        | 1                  | 2                        | 3                  | 99                                      |
| i) Badai yang dirasakan semakin sering akibat perubahan iklim                                                                                           | 1                  | 2                        | 3                  | 99                                      |
| j) Banjir dan erosi yang akibat perubahan iklim                                                                                                         | 1                  | 2                        | 3                  | 99                                      |
| <b>Isu terkait lahan</b>                                                                                                                                |                    |                          |                    |                                         |
| k) Perubahan tata lahan (contohnya: tebang dan bakar)                                                                                                   | 1                  | 2                        | 3                  | 99                                      |
| l) Penggunaan bahan kimia akibat kegiatan pertanian intensif                                                                                            | 1                  | 2                        | 3                  | 99                                      |
| m) Meningkatnya jumlah penduduk akibat kelahiran dan migrasi                                                                                            | 1                  | 2                        | 3                  | 99                                      |
| n) Kegiatan pariwisata                                                                                                                                  | 1                  | 2                        | 3                  | 99                                      |
| o) Pengelolaan sampah yang buruk                                                                                                                        | 1                  | 2                        | 3                  | 99                                      |
| p) Pengelolaan yang buruk untuk sampah plastik                                                                                                          | 1                  | 2                        | 3                  | 99                                      |
| q) Pengembangan sumber mata pencaharian alternatif selain penangkapan ikan                                                                              | 1                  | 2                        | 3                  | 99                                      |
| r) Pembangunan infrastruktur (contoh: sentra perikanan)                                                                                                 | 1                  | 2                        | 3                  | 99                                      |
| <b>Manajemen Lingkungan</b>                                                                                                                             |                    |                          |                    |                                         |
| s) Adanya kemauan dari pemerintah untuk membentuk peraturan dan perundangan                                                                             | 1                  | 2                        | 3                  | 99                                      |
| t) Penegakan hokum dan peraturan                                                                                                                        | 1                  | 2                        | 3                  | 99                                      |
| u) Inisiatif masyarakat lokal untuk meminta adanya pengelolaan yang lebih baik di wilayah pesisir dan laut                                              | 1                  | 2                        | 3                  | 99                                      |
| v) Adanya kegiatan dari LSM dan peneliti                                                                                                                | 1                  | 2                        | 3                  | 99                                      |
| <b>Isu Sosial</b>                                                                                                                                       |                    |                          |                    |                                         |
| w) Adanya hutang / piutang                                                                                                                              | 1                  | 2                        | 3                  | 99                                      |
| x) Kesenjangan dalam pendapatan dengan antar tetangga atau wilayah                                                                                      | 1                  | 2                        | 3                  | 99                                      |
